# Supplementary material for: A Pilot Study of the Effect of Evening Almond Butter Consumption on Overnight and Fasting Interstitial Glucose
Source: MDPI journal article supplement (doi:10.3390/diabetology3040038), 2022-09-26
Supplement: s1 [file s1]

# Supplementary Materials

Table S1. Results for fasting glucose (4–6 AM) outcome across three models.

| Fasting Glucose<br>(4–6 am)                         |                             |                                      |        | Fasting Glucose<br>(4–6 am) |                                      |        | Fasting Glucose<br>(4–6 am)  |                                          |       |
|-----------------------------------------------------|-----------------------------|--------------------------------------|--------|-----------------------------|--------------------------------------|--------|------------------------------|------------------------------------------|-------|
| Predictors                                          | Estimates                   | CI                                   | p      | Estimates                   | CI                                   | p      | Estimates                    | CI                                       | p     |
| (Intercept)                                         | 148.6 mg/dL<br>(8.2 mmol/L) | 94.9–202.3<br>(5.3–11.2 mmol/L)      | <0.001 | 150.8 mg/dL<br>(8.4 mmol/L) | 97.0–204.6<br>(5.4–11.4 mmol/L)      | <0.001 | 218.7 mg/dL<br>(12.1 mmol/L) | –117.5–554.9 mg/dL<br>(–6.5–30.8 mmol/L) | 0.202 |
| Condition<br>[Almond Butter]                        | 5.5 mg/dL (0.3 mmol/L)      | –0.9–12.0 mg/dL<br>(–0.1–0.7 mmol/L) | 0.091  | 5.1 mg/dL (0.3 mmol/L)      | –1.3–11.6 mg/dL<br>(–0.1–0.6 mmol/L) | 0.119  | 5.1 mg/dL (0.28 mmol/L)      | –1.3–11.6 mg/dL<br>(–0.1–0.6 mmol/L)     | 0.119 |
| Week in Study [2]                                   |                             |                                      |        | –3.8 mg/dL<br>(0.2 mmol/L)  | –10.2–2.7 mg/dL<br>(–0.6–0.2 mmol/L) | 0.254  | –3.8 mg/dL<br>(–0.2 mmol/L)  | –10.2–2.7 mg/dL<br>(–0.6–0.2 mmol/L)     | 0.254 |
| Age                                                 |                             |                                      |        |                             |                                      |        | –1.8 mg/dL<br>(–0.1 mmol/L)  | –7.7–4.1 mg/dL<br>(–0.4–0.2 mmol/L)      | 0.552 |
| Duration of Diabetes<br>(years)                     |                             |                                      |        |                             |                                      |        | 4.8 mg/dL<br>(0.3 mmol/L)    | –6.2–15.8 mg/dL<br>(–0.3–0.9 mmol/L)     | 0.390 |
| Random Effects                                      |                             |                                      |        |                             |                                      |        |                              |                                          |       |
| $\sigma^2$                                          | 325.19                      |                                      |        | 324.36                      |                                      |        | 324.36                       |                                          |       |
| $\tau_{00}$                                         | 6706.96 <sub>part_id</sub>  |                                      |        | 6696.47 <sub>part_id</sub>  |                                      |        | 7742.64 <sub>part_id</sub>   |                                          |       |
| ICC                                                 | 0.95                        |                                      |        | 0.95                        |                                      |        | 0.96                         |                                          |       |
| N                                                   | 9 <sub>part_id</sub>        |                                      |        | 9 <sub>part_id</sub>        |                                      |        | 9 <sub>part_id</sub>         |                                          |       |
| Observations                                        | 123                         |                                      |        | 123                         |                                      |        | 123                          |                                          |       |
| Marginal R <sup>2</sup> /Conditional R <sup>2</sup> | 0.001/0.954                 |                                      |        | 0.002/0.954                 |                                      |        | 0.093/0.964                  |                                          |       |

Table S2. Results for overnight glucose (12–3 AM) outcome across three models.

| Overnight Glucose (12 am–3 am) | Overnight Glucose (12 am–3 am) | Overnight Glucose (12 am–3 am) |
|--------------------------------|--------------------------------|--------------------------------|
|--------------------------------|--------------------------------|--------------------------------|

| Predictors                                             | Estimates                      | CI                                        | p      | Estimates                      | CI                                      | p      | Estimates                       | CI                                           | p     |
|--------------------------------------------------------|--------------------------------|-------------------------------------------|--------|--------------------------------|-----------------------------------------|--------|---------------------------------|----------------------------------------------|-------|
| (Intercept)                                            | 147.7<br>mg/dL (8.2<br>mmol/L) | 92.6–202.8<br>mg/dL (5.1–<br>11.3 mmol/L) | <0.001 | 150.5<br>mg/dL (8.4<br>mmol/L) | 95.3–205.6<br>mg/dL (5.3–<br>11.4)      | <0.001 | 203.6<br>mg/dL (11.3<br>mmol/L) | –146.1–553.3<br>mg/dL (–8.1–<br>30.7 mmol/L) | 0.254 |
| Condition<br>[Almond<br>Butter]                        | 5.5 mg/dL<br>(0.3<br>mmol/L)   | –0.8–11.8<br>mg/dL (–0.1–<br>0.7 mmol/L)  | 0.089  | 5.0 mg/dL<br>(0.3<br>mmol/L)   | –1.4–11.3<br>mg/dL (–0.1–0.6<br>mmol/L) | 0.123  | 5.0<br>mg/dL (0.3<br>mmol/L)    | –1.4–11.3<br>mg/dL (–0.1–<br>0.6 mmol/L)     | 0.123 |
| Week in<br>Study [2]                                   |                                |                                           |        | –4.6<br>mg/dL (0.3<br>mmol/L)  | –10.9–1.7<br>mg/dL (–0.6–0.1<br>mmol/L) | 0.152  | –4.6<br>mg/dL (0.3<br>mmol/L)   | –10.9–1.7<br>mg/dL (–0.6–<br>0.1 mmol/L)     | 0.153 |
| Age                                                    |                                |                                           |        |                                |                                         |        | –1.5<br>mg/dL (0.1<br>mmol/L)   | –7.7–4.6<br>mg/dL (–0.4–<br>0.3 mmol/L)      | 0.630 |
| Duration of<br>Diabetes<br>(years)                     |                                |                                           |        |                                |                                         |        | 4.6<br>mg/dL (0.3<br>mmol/L)    | –6.8–16.0<br>mg/dL (–0.4–<br>0.9 mmol/L)     | 0.428 |
| Random Effects                                         |                                |                                           |        |                                |                                         |        |                                 |                                              |       |
| $\sigma^2$                                             | 313.86                         |                                           |        | 311.03                         |                                         |        | 311.02                          |                                              |       |
| $\tau_{00}$                                            | 7065.20 <small>part_id</small> |                                           |        | 7048.57 <small>part_id</small> |                                         |        | 8382.64 <small>part_id</small>  |                                              |       |
| ICC                                                    | 0.96                           |                                           |        | 0.96                           |                                         |        | 0.96                            |                                              |       |
| N                                                      | 9 <small>part_id</small>       |                                           |        | 9 <small>part_id</small>       |                                         |        | 9 <small>part_id</small>        |                                              |       |
| Observations                                           | 123                            |                                           |        | 123                            |                                         |        | 123                             |                                              |       |
| Marginal<br>R <sup>2</sup> /Conditional R <sup>2</sup> | 0.001/0.958                    |                                           |        | 0.002/0.958                    |                                         |        | 0.076/0.967                     |                                              |       |

Figure S1. Individual differences in within-person variation

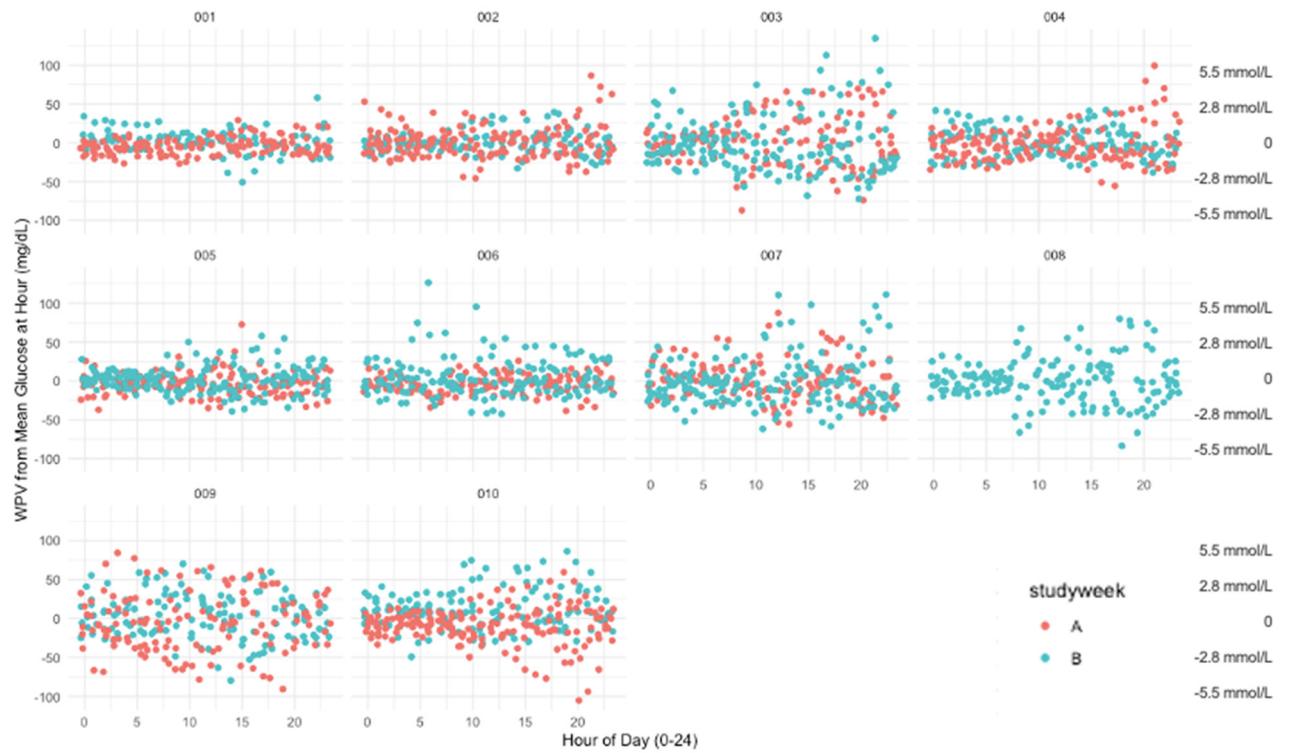

**Figure S1.** For each participant, and hour of the day, average glucose (mg/dL) was calculated. On the day-hour level time-series for each participant, their average glucose from the previous step was subtracted to produce a within-person variation metric (negative = value at timepoint is less than the mean for that person and hour of the day). This metric is visualized in the figure above, illustrating that in addition to significant between-person variation in glucose regulation, there are individual differences in within-person variation. Compare participant 001 and participant 006: both have mean glucose (across the entire study period) of 96 mg/dL (5.3 mmol/L); participant 001 has SD of glucose over the study period of 14.4 mg/dL (0.8 mmol/L), as compared with participant 006 that has standard deviation of glucose of 21.3 mg/dL (1.2 mmol/L). Participant 010 has an average glucose of 38 mg/dL (2.1 mmol/L) higher than both participant 001 and 006, and an SD of glucose of 31.1 mg/dL (1.7 mmol/L). A = Control, B = Almond Butter week.
